# Supplementary material for: A facile and scalable fabrication method for thin film composite reverse osmosis membranes: dual-layer slot coating
Source: Royal Society of Chemistry journal article supplement (doi:10.1039/c7ta00891k), 2017-01-01
Supplement: c7ta00891k1.pdf [file c7ta00891k1.pdf]

# A Facile and Scalable Fabrication Method of Thin Film Composite Reverse Osmosis Membranes: *Dual-Layer Slot Coating*

Sung-Joon Park,<sup>a,‡</sup> Won-Gi Ahn,<sup>a,‡</sup> Wansuk Choi,<sup>a</sup> Sang-Hee Park,<sup>a</sup> Jong Suk Lee,<sup>b</sup> Hyun Wook Jung,<sup>a,\*</sup> and Jung-Hyun Lee<sup>a,\*</sup>

<sup>a</sup>Department of Chemical and Biological Engineering, Korea University, 5-1 Anam-dong, Seongbuk-gu, Seoul 136-713, Republic of Korea, \*E-mail: [leejhyy@korea.ac.kr](mailto:leejhyy@korea.ac.kr); [hwjung@grtrkr.korea.ac.kr](mailto:hwjung@grtrkr.korea.ac.kr)

<sup>b</sup>Department of Chemical and Biomolecular Engineering, Sogang University, Sinsu-dong, Mapo-gu, Seoul 121-742, Republic of Korea.

SUPPORTING INFORMATION

**Table S1.** Water contact angle ( $^{\circ}$ ) and surface roughness (*rms*, nm) of the IP membranes (prepared on the PAN and HPAN supports) and the DSC membrane (prepared on the HPAN support) as a function of MPD concentrations.

| Membrane         | Properties          | MPD concentration (wt.%) |                |                |                |
|------------------|---------------------|--------------------------|----------------|----------------|----------------|
|                  |                     | 2.0                      | 0.1            | 0.05           | 0.025          |
| IP<br>(on PAN)   | Water contact angle | 71.8 $\pm$ 1.9           | 70.8 $\pm$ 1.7 | 71.3 $\pm$ 1.4 | 70.4 $\pm$ 1.4 |
|                  | surface roughness   | 26.8 $\pm$ 6.7           | 21.2 $\pm$ 7.0 | 18.1 $\pm$ 5.5 | 14.8 $\pm$ 5.2 |
| IP<br>(on HPAN)  | Water contact angle | 70.3 $\pm$ 1.3           | 70.5 $\pm$ 1.8 | 69.9 $\pm$ 1.6 | 70.1 $\pm$ 1.2 |
|                  | surface roughness   | 26.9 $\pm$ 9.5           | 25.1 $\pm$ 7.2 | 22.5 $\pm$ 6.6 | 21.8 $\pm$ 6.9 |
| DSC<br>(on HPAN) | Water contact angle | 65.8 $\pm$ 1.2           | 66.1 $\pm$ 1.5 | 65.7 $\pm$ 1.7 | 65.0 $\pm$ 1.5 |
|                  | surface roughness   | 9.3 $\pm$ 1.1            | 5.2 $\pm$ 0.7  | 3.5 $\pm$ 0.6  | 1.4 $\pm$ 0.2  |
